# Supplementary material for: Reduction of Cell Fusion by Deletion in the Hypervariable Region of the Spike Protein of Mouse Hepatitis Virus
Source: MDPI journal article supplement (doi:10.3390/v14020398), 2022-02-15
Supplement: s1 [file s1]

# Supplementary Material

|             |                                                               |             |                                                                |
|-------------|---------------------------------------------------------------|-------------|----------------------------------------------------------------|
| cl-2_spike  | MLFVFILLPSCIGYIGDFRCIQTVNYNGWNASAPSISTEANDVSHGLGTYTVLDRVYLN   | cl-2_spike  | EMPLNYFDSYLGCVVWADNRDEALPWCILRMGAGLCVDYSKSRARRSVSTGYRLTTF      |
| JHM-X_spike | MLFVFILLPSCIGYIGDFRCIQTVNYNGWNASAPSISTEANDVSHGLGTYTVLDRVYLN   | JHM-X_spike | EMPLNYFDSYLGCVVWADNRDEALPWCILRMGAGLCVDYSKSRARRSVSTGYRLTTF      |
| cl-2_spike  | ATLLLTGYYPVDGSMYNNALTGINTLSLTWENPFLSEFNDGIFARVQNLKNTIPTGAT    | cl-2_spike  | EPMFMILVNDVSVQSVGLIYEMQIPINFTIGHHEEFIQIRAPKVTIDCAAFVCGDMAACRQ  |
| JHM-X_spike | ATLLLTGYYPVDGSMYNNALTGINTLSLTWENPFLSEFNDGIFARVQNLKNTIPTGAT    | JHM-X_spike | EPMFMILVNDVSVQSVGLIYEMQIPINFTIGHHEEFIQIRAPKVTIDCAAFVCGDMAACRQ  |
| cl-2_spike  | SYFPTIVIGSLFGNTSYTVVLEPYNNIMASVCTYITICQLPYTPCKPNTNGNRVIGFWHT  | cl-2_spike  | QLVEYGSFCDNVNAILNEVNNLLDNMQQLVASALMQGVITSSRLPDGIGSPIDIDNFSPL   |
| JHM-X_spike | SYFPTIVIGSLFGNTSYTVVLEPYNNIMASVCTYITICQLPYTPCKPNTNGNRVIGFWHT  | JHM-X_spike | QLVEYGSFCDNVNAILNEVNNLLDNMQQLVASALMQGVITSSRLPDGIGSPIDIDNFSPL   |
| cl-2_spike  | DWKPPICLLKNFTFNUNAFLYHFYQQGGTFYAYAKPSSATTFELFSVYIGDILTIQFP    | cl-2_spike  | LGCTGSTCAEDGNGPSAIRGRSAIEDLLFDRVKLSOVGFVEATNCTGQGEVADLLCVQS    |
| JHM-X_spike | DWKPPICLLKNFTFNUNAFLYHFYQQGGTFYAYAKPSSATTFELFSVYIGDILTIQFP    | JHM-X_spike | LGCTGSTCAEDGNGPSAIRGRSAIEDLLFDRVKLSOVGFVEATNCTGQGEVADLLCVQS    |
| cl-2_spike  | VLFPICPTAGSTLAPLYWVTPLLRQYLFNFNEKGVITSADVCASSYISEIKNTQSL      | cl-2_spike  | FMGINKVLPVULSESQISGTTAGATAAAMPPEPTAAAQVPSLVNQYRIMG LGVTMNVLSE  |
| JHM-X_spike | VLFPICPTAGSTLAPLYWVTPLLRQYLFNFNEKGVITSADVCASSYISEIKNTQSL      | JHM-X_spike | FMGINKVLPVULSESQISGTTAGATAAAMPPEPTAAAQVPSLVNQYRIMG LGVTMNVLSE  |
| cl-2_spike  | PSTGVYDLGTYVQFVGVTTRVFNLPDCKIEEWLTAKSVPSPLNWEREPQMCNFWLSS     | cl-2_spike  | NQMIASAFNNALGAIQEGFDATNSALGHQISVNVNNAEALNNLLNQLSNRPGAISLQ      |
| JHM-X_spike | PSTGVYDLGTYVQFVGVTTRVFNLPDCKIEEWLTAKSVPSPLNWEREPQMCNFWLSS     | JHM-X_spike | NQMIASAFNNALGAIQEGFDATNSALGHQISVNVNNAEALNNLLNQLSNRPGAISLQ      |
| cl-2_spike  | LLRYVQAESLSCNNIDASKVYGMCPGVSVDKFAIPRSQIDLIQIGNSGFLQTANYKIDT   | cl-2_spike  | EILTRLDAVEAKAQIDRLINGRLTALNAYISNQLSDSTLIFSAQAIEKVNCEVNSQTT     |
| JHM-X_spike | LLRYVQAESLSCNNIDASKVYGMCPGVSVDKFAIPRSQIDLIQIGNSGFLQTANYKIDT   | JHM-X_spike | EILTRLDAVEAKAQIDRLINGRLTALNAYISNQLSDSTLIFSAQAIEKVNCEVNSQTT     |
| cl-2_spike  | AATSCQLVYISLPNNVTINNNYFSSWNRRTGFNDAGVFGNSHHDVAYAQCCFTVRFSTYCP | cl-2_spike  | RIMFCGNGNHLSLVQNAFPGLCFIHESVYVTSFKTANVSPGLCISGDGLAPKAGYFVQ     |
| JHM-X_spike | AATSCQLVYISLPNNVTINNNYFSSWNRRTGFNDAGVFGNSHHDVAYAQCCFTVRFSTYCP | JHM-X_spike | RIMFCGNGNHLSLVQNAFPGLCFIHESVYVTSFKTANVSPGLCISGDGLAPKAGYFVQ     |
| cl-2_spike  | CAQPDIVSACTSQTRPMSAYCTPTGTIHRECSLWNGPHLSARVGSCTYTCECTCKENPFDD | cl-2_spike  | DNGEWHFTGSNTYTPETITDKNSVVMISCAVNYTHAEFEVFLMNSIPNLPDFKEELDKWFK  |
| JHM-X_spike | CAQPDIVSACTSQTRPMSAYCTPTGTIHRECSLWNGPHLSARVGSCTYTCECTCKENPFDD | JHM-X_spike | DNGEWHFTGSNTYTPETITDKNSVVMISCAVNYTHAEFEVFLMNSIPNLPDFKEELDKWFK  |
| cl-2_spike  | TYDLGCGQIKTIIVVNGDRCEGLGVLEDCGNSDPHAGCSCANDSPFGWSDTCLVNDRCQ   | cl-2_spike  | NQTSIAPDLSLDPEKLNVTFLDLTYEMNR IQDAINKLINESYINLKEVGTYEMTVKWEWTV |
| JHM-X_spike | TYDLGCGQIKTIIVVNGDRCEGLGVLEDCGNSDPHAGCSCANDSPFGWSDTCLVNDRCQ   | JHM-X_spike | NQTSIAPDLSLDPEKLNVTFLDLTYEMNR IQDAINKLINESYINLKEVGTYEMTVKWEWTV |
| cl-2_spike  | IFANILLNGINSCTTCTDLDLQLENTAVATGVCVRDYLYGTTGQGVKEVKADYNSWQAL   | cl-2_spike  | WLLIGLAGVAVCVLLFFPICCTGCGSCCFKRCGSCCDEYGGHQDSIVIINISAHED       |
| JHM-X_spike | IFANILLNGINSCTTCTDLDLQLENTAVATGVCVRDYLYGTTGQGVKEVKADYNSWQAL   | JHM-X_spike | WLLIGLAGVAVCVLLFFPICCTGCGSCCFKRCGSCCDEYGGHQDSIVIINISAHED       |
| cl-2_spike  | LYDVNGNLNGFRDLTNNKTYYIRSCYSGRVSAAYHKEAPEPALLYRNIMCSTVFTNNISR  |             |                                                                |
| JHM-X_spike | LYDVNGNLNGFRDLTNNKTYYIRSCYSGRVSAAYHKEAPEPALLYRNIMCSTVFTNNISR  |             |                                                                |

**Figure S1.** Amino acid sequence alignment of cl-2 and JHM-X spike proteins. The amino acids marked in yellow indicate the 153 amino acid deletion in the HVR of the JHM-X spike protein, and green indicates other mutations.
